# Supplementary material for: Soluble Alpha-APP (sAPPalpha) Regulates CDK5 Expression and Activity in Neurons
Source: PubMed Central journal article supplement (PMC3679172; doi:10.1371/journal.pone.0065920), 2013-06-11
Supplement: pone.0065920.s001.pdf [file pone.0065920.s001.pdf]

**Supplementary table 1:** Proteins identified as significantly altered in expression after 1 h or 48 h incubation with sAPPalpha. Proteins altered in both treatment conditions (1 h and 48 h) are highlighted in grey.

| treatment condition | p-value | ratio (treated / control) | gene name | protein name                                                         | Unique peptides | Sequence coverage (%) |
|---------------------|---------|---------------------------|-----------|----------------------------------------------------------------------|-----------------|-----------------------|
| 1h                  | 0.048   | 1.240                     | Acaa1a    | 3-ketoacyl-CoA thiolase A, peroxisomal                               | 8               | 19                    |
| 1h                  | 0.025   | 1.338                     | Aco2      | Aconitate hydratase, mitochondrial                                   | 2               | 2                     |
| 1h                  | 0.025   | 1.391                     | Actb      | Actin, cytoplasmic 1                                                 | 6               | 22                    |
| 1h                  | 0.007   | 1.304                     | Actr1a    | Alpha-centractin                                                     | 6               | 18                    |
| 1h                  | 0.021   | 0.819                     | Arl3      | ADP-ribosylation factor-like protein 3                               | 3               | 19                    |
| 1h                  | 0.034   | 1.208                     | Atp5a1    | ATP synthase subunit alpha, mitochondrial                            | 20              | 33                    |
| 1h                  | 0.039   | 1.206                     | Atp5b     | ATP synthase subunit beta, mitochondrial                             | 19              | 31                    |
| 1h                  | 0.006   | 1.814                     | Atp5b     | ATP synthase subunit beta, mitochondrial                             | 4               | 13                    |
| 1h                  | 0.023   | 1.528                     | Atp6v1a   | V-type proton ATPase catalytic subunit A                             | 12              | 20                    |
| 1h                  | 0.012   | 0.779                     | Basp1     | Brain acid soluble protein 1                                         | 8               | 58                    |
| 48h                 | 0.033   | 1.234                     | Cbx3      | Chromobox protein homolog 3 (HP1-gamma)                              | 2               | 7                     |
| 48h                 | 0.006   | 1.349                     | Cbx3      | Chromobox protein homolog 3 (HP1-gamma)                              | 2               | 7                     |
| 1h                  | 0.037   | 0.571                     | Cdk5      | Cell division protein kinase 5                                       | 5               | 14                    |
| 48h                 | 0.050   | 0.751                     | Cdk5      | Cell division protein kinase 5                                       | 5               | 14                    |
| 48h                 | 0.017   | 0.674                     | Cfl1      | Cofilin-1                                                            | 2               | 18                    |
| 1h                  | 0.004   | 1.537                     | Cops4     | COP9 signalosome complex subunit 4                                   | 9               | 24                    |
| 1h                  | 0.010   | 1.369                     | Crmp1     | Dihydropyrimidinase-related protein 1                                | 2               | 5                     |
| 1h                  | 0.010   | 1.369                     | Dpysl2    | Dihydropyrimidinase-related protein 2 (CRMP2)                        | 2               | 5                     |
| 48h                 | 0.002   | 1.645                     | Dpysl2    | Dihydropyrimidinase-related protein 2 (CRMP2)                        | 5               | 12                    |
| 1h                  | 0.038   | 1.523                     | Dpysl4    | Dihydropyrimidinase-related protein 4                                | 2               | 5                     |
| 1h                  | 0.021   | 0.627                     | Eef1a1    | Elongation factor Tu, mitochondrial                                  | 9               | 19                    |
| 1h                  | 0.042   | 2.060                     | Eef2      | Elongation factor 2                                                  | 9               | 10                    |
| 1h                  | 0.023   | 0.702                     | Endog1    | Nuclease EXOG, mitochondrial                                         | 4               | 10                    |
| 1h                  | 0.029   | 1.254                     | Erlin2    | Erlin-2                                                              | 9               | 22                    |
| 1h                  | 0.045   | 0.793                     | Fabp7     | Fatty acid-binding protein, brain                                    | 3               | 31                    |
| 48h                 | 0.039   | 0.747                     | Fkbp2     | FK506-binding protein 2                                              | 3               | 18                    |
| 1h                  | 0.039   | 1.328                     | Fscn1     | Fascin                                                               | 8               | 19                    |
| 1h                  | 0.033   | 0.828                     | Got2      | Aspartate aminotransferase, mitochondrial                            | 10              | 25                    |
| 1h                  | 0.035   | 0.525                     | Hist1h2ba | Histone H2B type 1-A                                                 | 2               | 14                    |
| 1h                  | 0.005   | 0.598                     | Hist1h2ba | Histone H2B type 1-A                                                 | 2               | 15                    |
| 48h                 | 0.026   | 0.613                     | Hist1h2ba | Histone H2B type 1-A                                                 | 2               | 14                    |
| 1h                  | 0.043   | 0.826                     | Hist1h4a  | Histone H4                                                           | 2               | 19                    |
| 1h                  | 0.027   | 1.376                     | Hist1h4a  | Histone H4                                                           | 2               | 19                    |
| 1h                  | 0.023   | 1.643                     | Hmgcs1    | Hydroxymethylglutaryl-CoA synthase, cytoplasmic                      | 7               | 12                    |
| 1h                  | 0.036   | 0.825                     | Hnrnpa1   | Heterogeneous nuclear ribonucleoprotein A1                           | 8               | 29                    |
| 1h                  | 0.040   | 0.806                     | Hnrnpa1   | Heterogeneous nuclear ribonucleoprotein A1                           | 8               | 31                    |
| 1h                  | 0.023   | 0.721                     | Hnrnpa2b1 | Heterogeneous nuclear ribonucleoproteins A2/B1                       | 10              | 33                    |
| 1h                  | 0.008   | 1.250                     | Hsd17b8   | Estradiol 17-beta-dehydrogenase 8                                    | 2               | 10                    |
| 48h                 | 0.025   | 1.440                     | Hyou1     | Hypoxia up-regulated 1 (ORP150)                                      | 4               | 4                     |
| 1h                  | 0.043   | 1.246                     | Hyou1     | Hypoxia up-regulated 1 (ORP150)                                      | 4               | 4                     |
| 1h                  | 0.011   | 1.253                     | Idh3a     | Isocitrate dehydrogenase [NAD] subunit alpha, mitochondrial          | 10              | 29                    |
| 1h                  | 0.013   | 1.318                     | Ina       | Alpha-Internexin                                                     | 5               | 2                     |
| 1h                  | 0.007   | 0.775                     | Mtpn      | Myotrophin                                                           | 2               | 27                    |
| 1h                  | 0.046   | 0.693                     | Myh10     | Myosin-10                                                            | 3               | 2                     |
| 1h                  | 0.013   | 1.215                     | Ndufaf2   | Mimitin, mitochondrial                                               | 8               | 51                    |
| 1h                  | 0.045   | 1.481                     | Ndufs3    | NADH dehydrogenase [ubiquinone] iron-sulfur protein 3, mitochondrial | 4               | 12                    |
| 48h                 | 0.016   | 0.801                     | Ndufs4    | NADH dehydrogenase [ubiquinone] iron-sulfur protein 4, mitochondrial | 4               | 25                    |
| 1h                  | 0.038   | 1.310                     | Npm1      | Nucleophosmin                                                        | 6               | 19                    |
| 1h                  | 0.002   | 1.263                     | Oxct1     | Succinyl-CoA:3-ketoacid-coenzyme A transferase 1, mitochondrial      | 3               | 7                     |
| 1h                  | 0.050   | 0.816                     | Pcbp2     | Poly(rC)-binding protein 2                                           | 2               | 8                     |
| 1h                  | 0.024   | 1.578                     | Pcd6ip    | Programmed cell death 6-interacting protein                          | 2               | 3                     |
| 1h                  | 0.040   | 0.739                     | Pea15a    | Astrocytic phosphoprotein PEA-15                                     | 2               | 22                    |
| 1h                  | 0.043   | 1.585                     | Ppia      | Peptidyl-prolyl cis-trans isomerase A                                | 5               | 37                    |
| 1h                  | 0.037   | 1.211                     | Psm7      | 26S proteasome non-ATPase regulatory subunit 7                       | 6               | 17                    |
| 1h                  | 0.045   | 0.821                     | Sh3bgr1   | SH3 domain-binding glutamic acid-rich-like protein                   | 5               | 44                    |
| 1h                  | 0.036   | 0.825                     | Slc25a22  | Mitochondrial glutamate carrier 1                                    | 8               | 20                    |
| 1h                  | 0.029   | 1.692                     | Spr       | Septapterin reductase                                                | 2               | 11                    |
| 48h                 | 0.048   | 0.803                     | Stxbp1    | Syntaxin-binding protein 1                                           | 2               | 3                     |
| 1h                  | 0.022   | 0.787                     | Suclg1    | Succinyl-CoA ligase [GDP-forming] subunit alpha, mitochondrial       | 3               | 11                    |
| 1h                  | 0.033   | 0.795                     | Tomm22    | Mitochondrial import receptor subunit TOM22 homolog                  | 2               | 8                     |
| 1h                  | 0.003   | 1.274                     | Trap1     | Heat shock protein 75 kDa, mitochondrial                             | 15              | 24                    |
| 1h                  | 0.048   | 0.708                     | Tubb2a    | Tubulin beta-2A chain                                                | 2               | 6                     |
| 1h                  | 0.005   | 0.787                     | Tubb2b    | Tubulin beta-2B chain                                                | 2               | 6                     |
| 1h                  | 0.025   | 0.818                     | Tubb2b    | Tubulin beta-2B chain                                                | 5               | 12                    |
| 48h                 | 0.000   | 0.594                     | Tubb2b    | Tubulin beta-2B chain                                                | 2               | 6                     |
| 1h                  | 0.028   | 0.731                     | Uqcrh     | Cytochrome b-c1 complex subunit 6, mitochondrial                     | 2               | 24                    |
